# Supplementary material for: Mechanism of magnetisation relaxation in {MIII2DyIII2} (M = Cr, Mn, Fe, Al) “Butterfly” complexes: how important are the transition metal ions here?
Source: Royal Society of Chemistry journal article supplement (doi:10.1039/c8sc05362f), 2019-01-01

## PHI report - Cr2Y21\_sus only

### Input:

```
****ion
Cr(III)Oh
Cr(III)Oh
****fit
simplex
-5
ex 1 2 4
----
****sus
bsus 0.1
sweep 2 300 54
****params
opmode fit s
****end
```

### Output:

```
=====
Finished Powell with          70 iterations
-----
-0.4911109847180712
EX   1   2   4
-----
Residual: 0.09489546291269857
Residual reduced by: 114.02307986551365
                or: 99.916844421188173%
=====
```

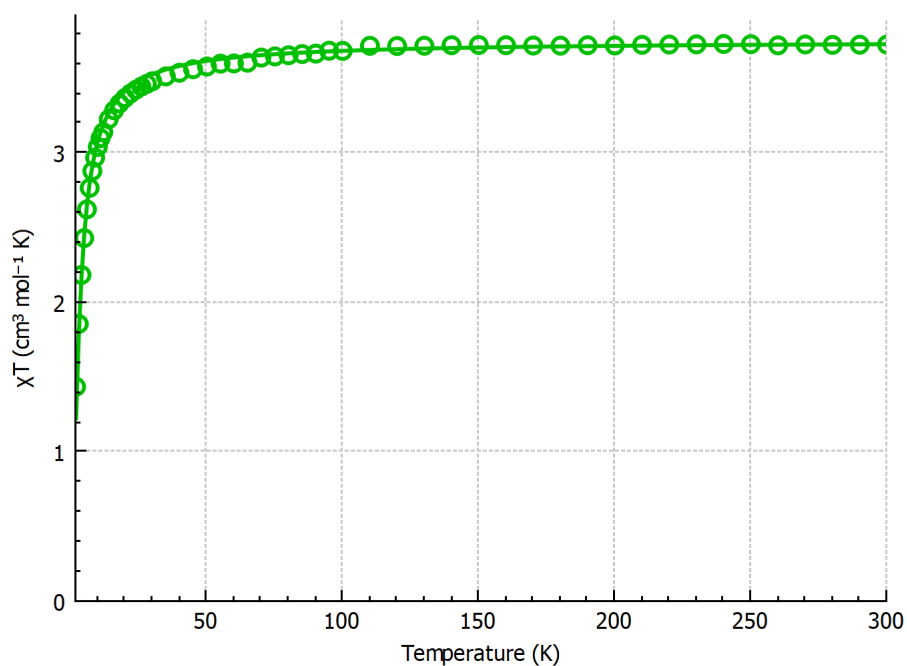

### Susceptibility:

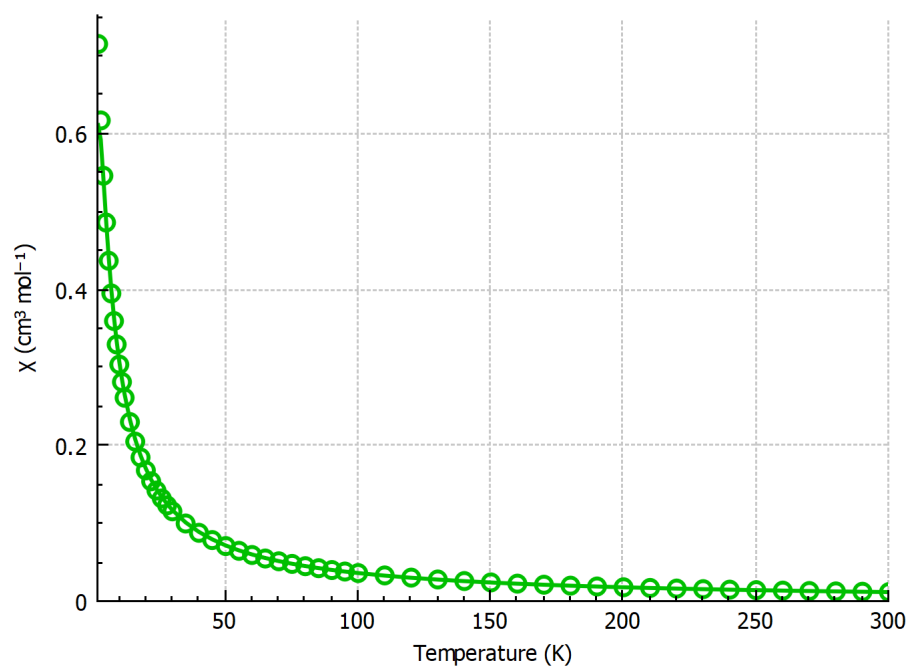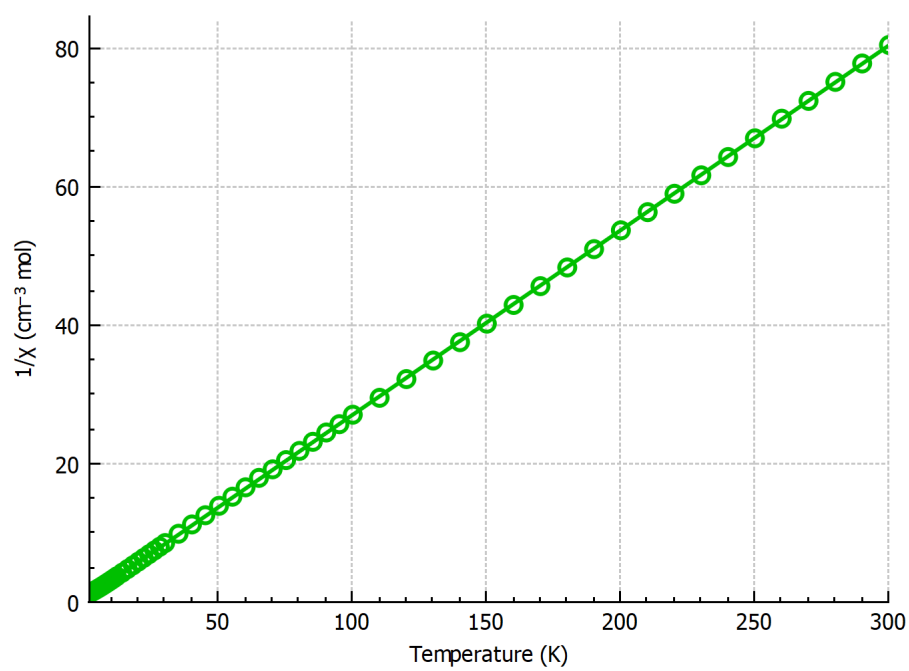

Supplement: c8sc05362f1.zip [file c8sc05362f1.zip]
