# Supplementary material for: Mechanism of magnetisation relaxation in {MIII2DyIII2} (M = Cr, Mn, Fe, Al) “Butterfly” complexes: how important are the transition metal ions here?
Source: Royal Society of Chemistry journal article supplement (doi:10.1039/c8sc05362f), 2019-01-01

## PHI report - Mn2Y21\_Sus only

### Input:

```
****ion
Mn (III) Oh (w)
Mn (III) Oh (w)
****fit
simplex
-5
ex 1 2 4
----
2.00
GF 1 4 0
GF 2 4 0
----
****sus
bsus 0.1
sweep 2 300 63
****params
opmode fit s
****end
```

### Output:

```
=====
Finished Simplex with          205 iterations
-----
-1.0050129102255447
EX   1   2   4
-----
1.9201404404433422
GF   1   4   0
GF   2   4   0
-----
Residual: 1.5840434218567376
Residual reduced by: 157.29714135028146
                   or: 99.003001252710618%
=====
```

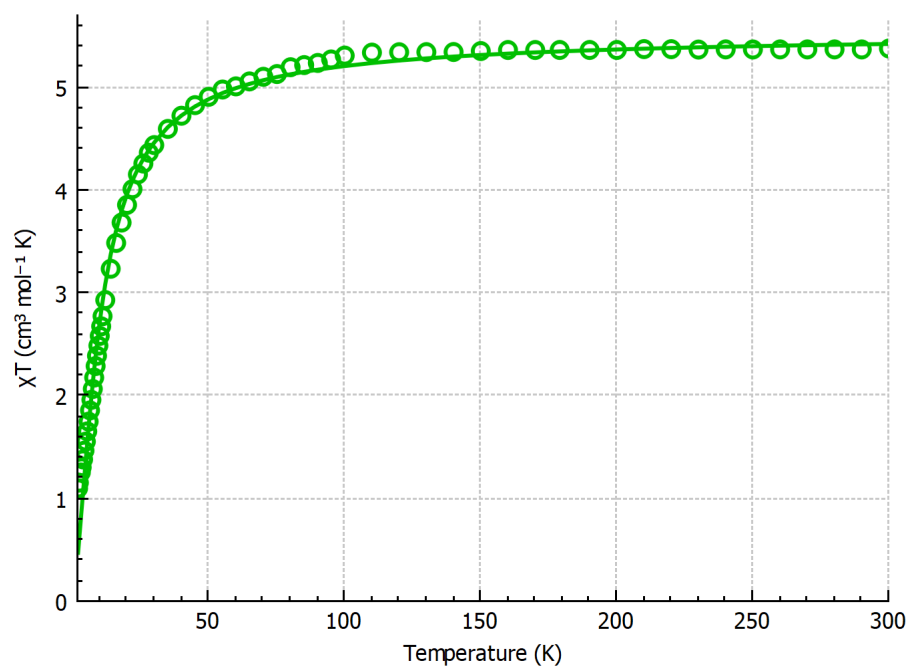

**Susceptibility:**

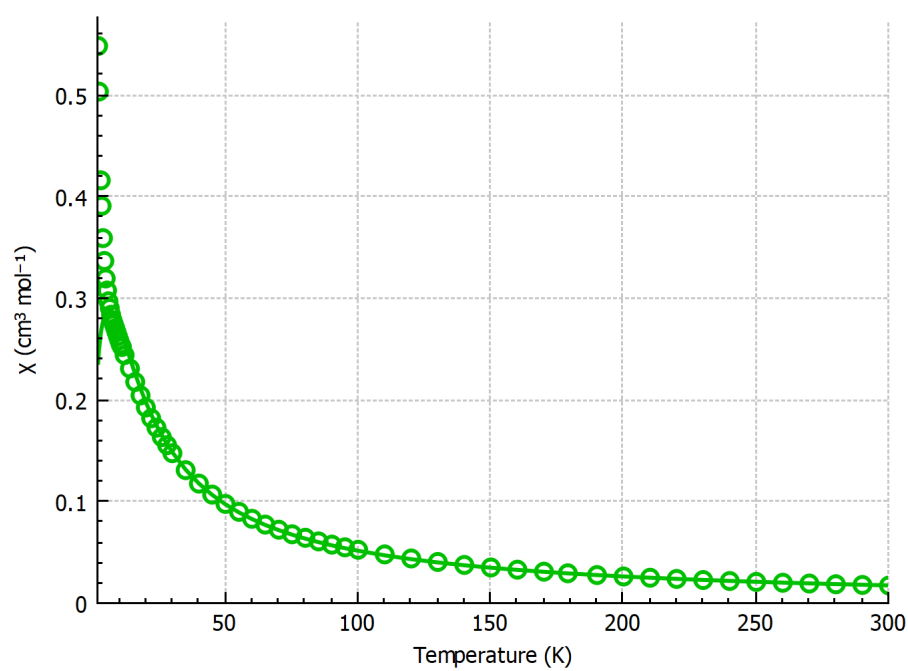

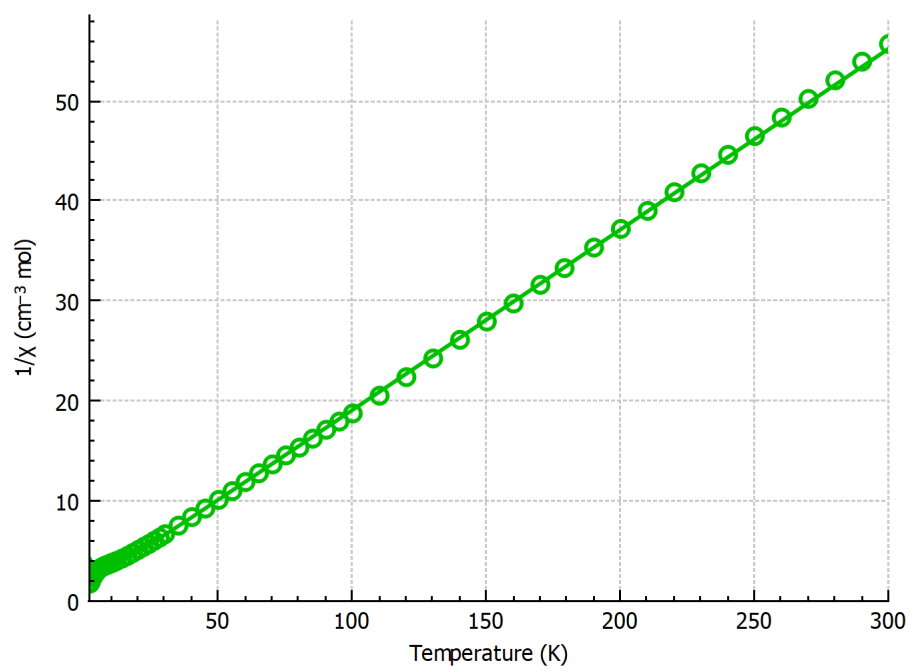

Supplement: c8sc05362f1.zip [file c8sc05362f1.zip]
