# Supplementary material for: Mechanism of magnetisation relaxation in {MIII2DyIII2} (M = Cr, Mn, Fe, Al) “Butterfly” complexes: how important are the transition metal ions here?
Source: Royal Society of Chemistry journal article supplement (doi:10.1039/c8sc05362f), 2019-01-01

## PHI report - Cr2Y2\_fitting

### Input:

```
****ion
Cr(III) Oh
Cr(III) Oh
****fit
simplex
-5
ex 1 2 4
----
****sus
bsus 0.1
sweep 2 300 54
****mag
tmag 2 5
sweep 0 7 26
****params
opmode fit sm
****end
```

### Output:

```
=====
Finished Powell with          118 iterations
-----
-0.4855258039082228
EX   1   2   4
-----
Residual: 1.2497149551946805
Residual reduced by:  0.727342811264149E+005
                   or: 99.998281837032408%
=====
```

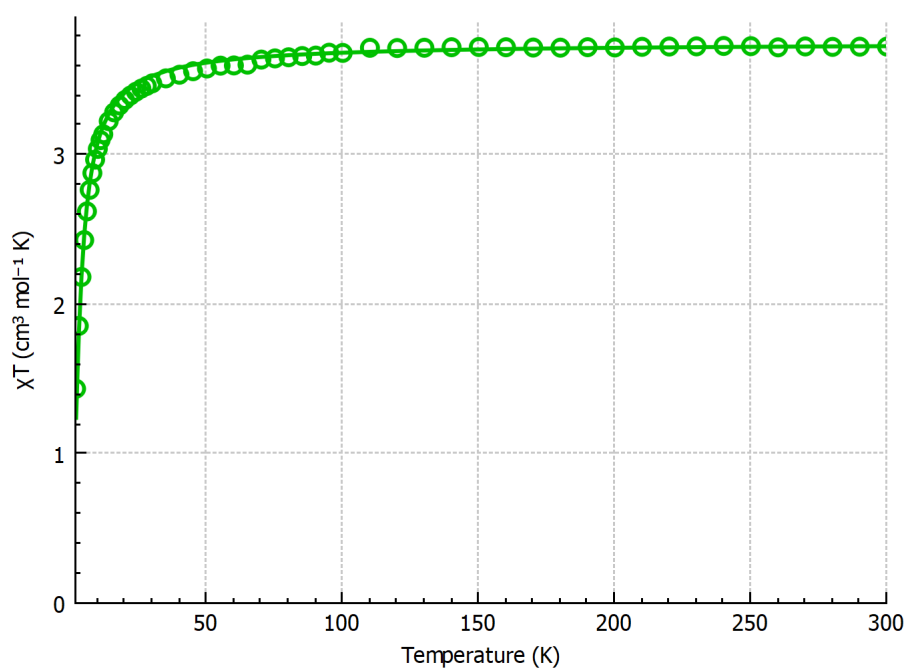

### Susceptibility:

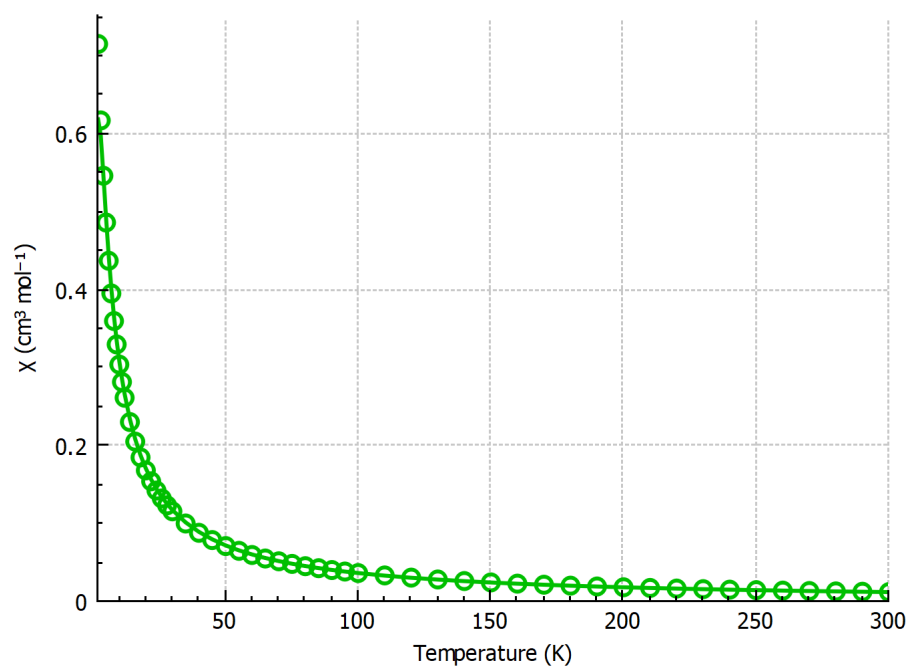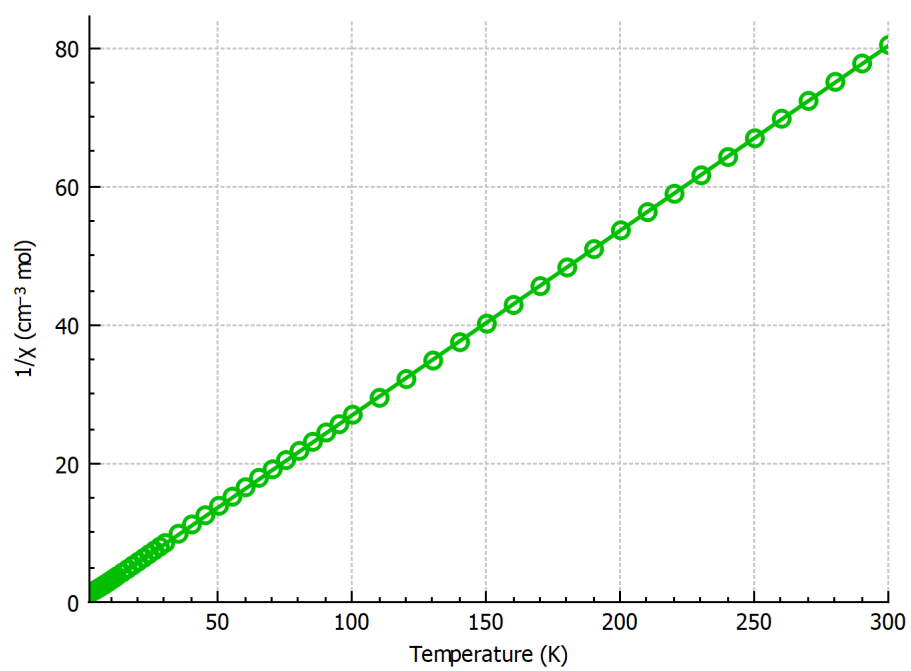

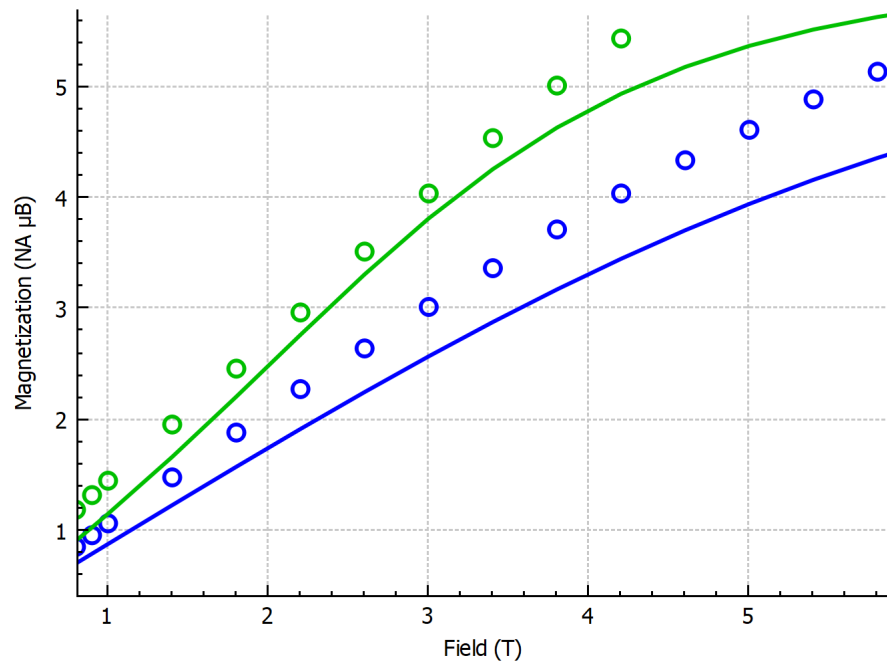

**Magnetization:**

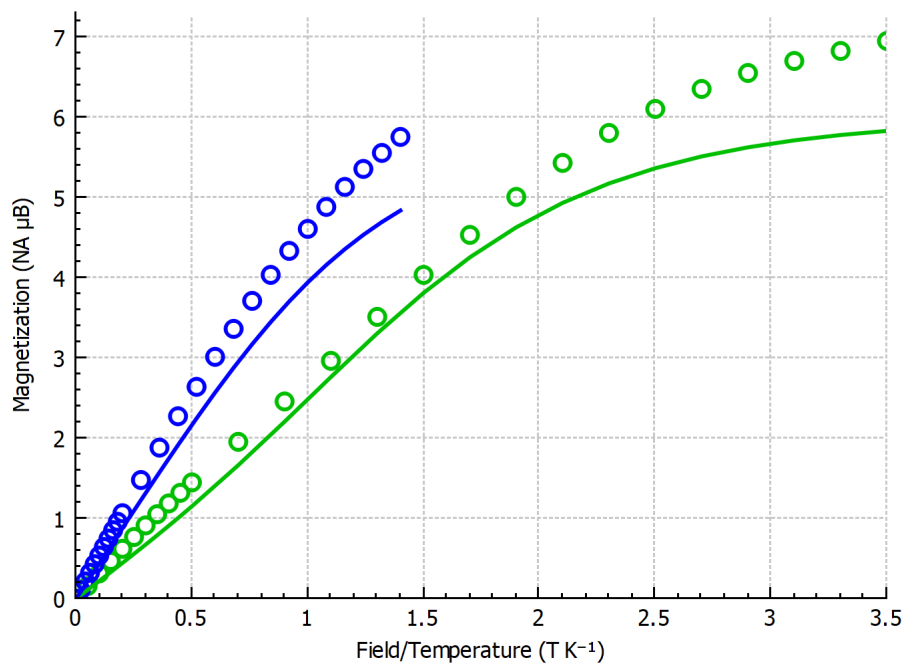

Supplement: c8sc05362f1.zip [file c8sc05362f1.zip]
