# Supplementary material for: Mechanism of magnetisation relaxation in {MIII2DyIII2} (M = Cr, Mn, Fe, Al) “Butterfly” complexes: how important are the transition metal ions here?
Source: Royal Society of Chemistry journal article supplement (doi:10.1039/c8sc05362f), 2019-01-01

## PHI report - Mn2Y2\_sus+mag

### Input:

```
****ion
Mn (III) Oh (w)
Mn (III) Oh (w)
****fit
simplex
-5
ex 1 2 4
----
2.00
GF 1 4 0
GF 2 4 0
----
****sus
bsus 0.1
sweep 2 300 63
****mag
tmag 2 5
sweep 0 7 26
****params
opmode fit sm
****end
```

### Output:

```
=====
Finished Simplex with          222 iterations
-----
-1.3095589165284132
EX   1   2   4
-----
1.9431301919485353
GF   1   4   0
GF   2   4   0
-----
Residual: 9.0167377644209079
Residual reduced by: 0.178658066017910E+005
                  or: 99.949556213266362%
=====
```

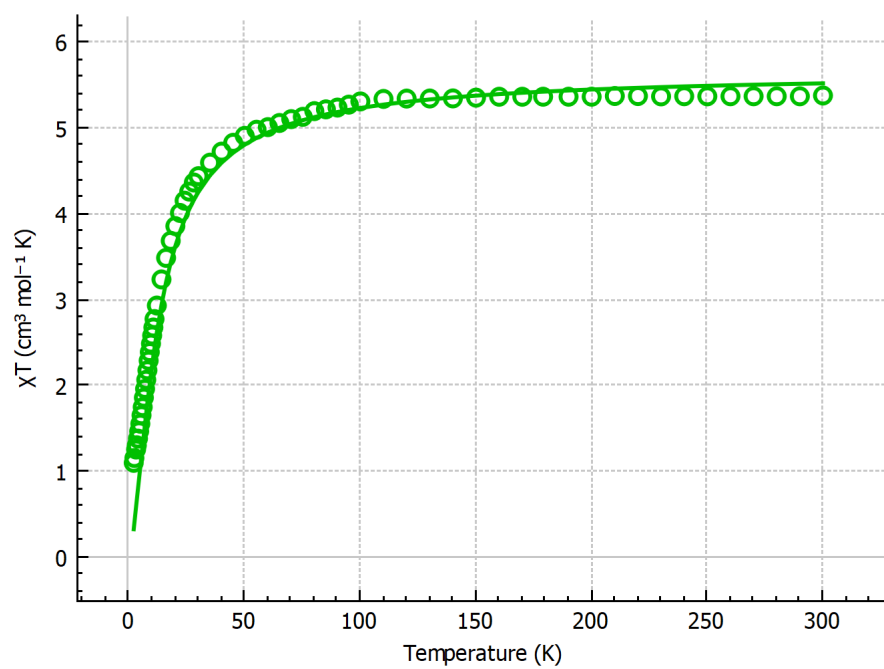

**Susceptibility:**

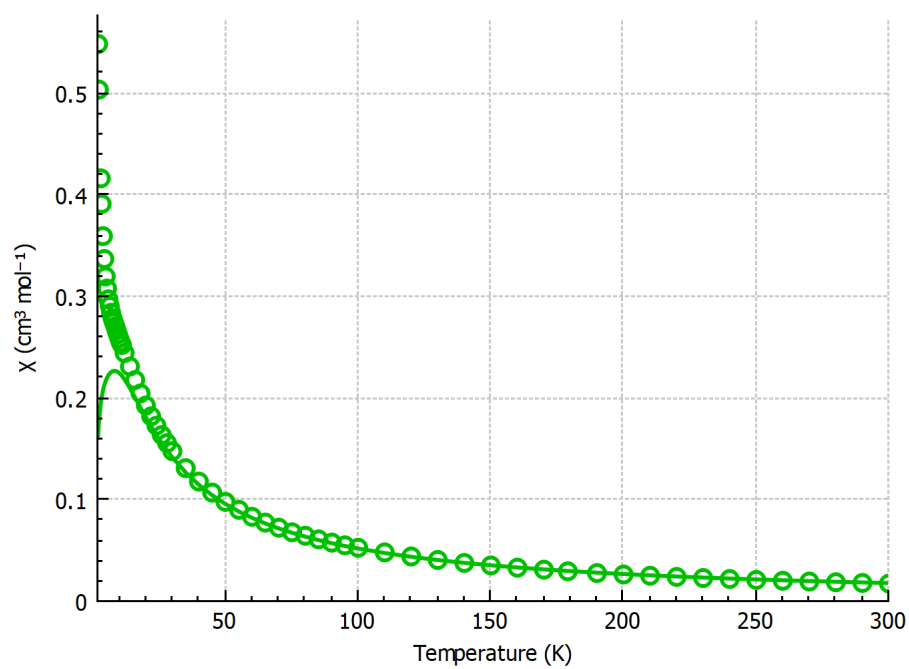

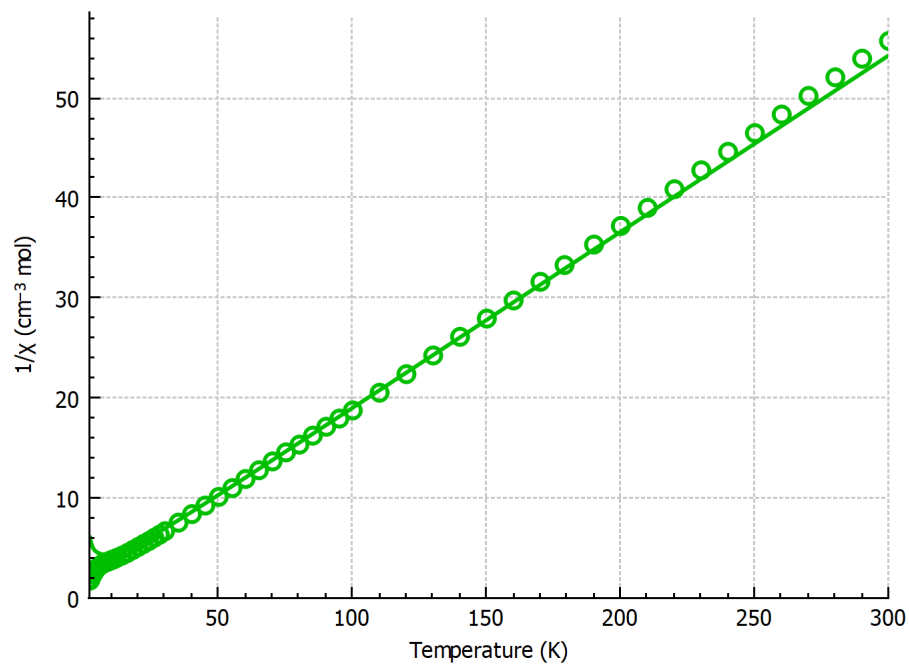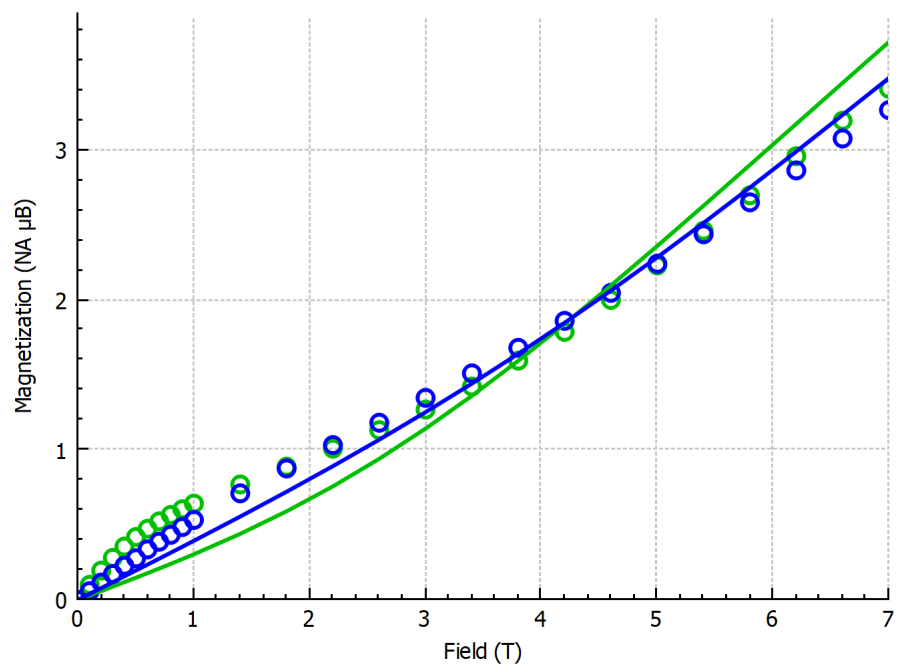

**Magnetization:**

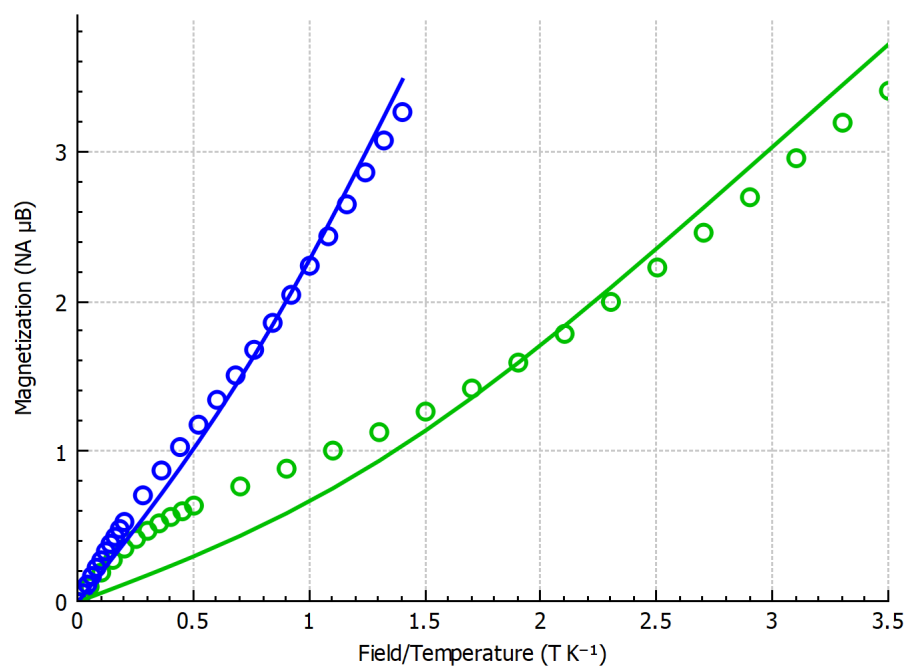

Supplement: c8sc05362f1.zip [file c8sc05362f1.zip]
