# Supplementary material for: Mechanism of magnetisation relaxation in {MIII2DyIII2} (M = Cr, Mn, Fe, Al) “Butterfly” complexes: how important are the transition metal ions here?
Source: PubMed Central journal article supplement — Chem Sci. 2019 Apr 16;10(21):5528–38. doi: 10.1039/c8sc05362f (PMC6552965; doi:10.1039/c8sc05362f), 2019-04-16
Supplement: SC-010-C8SC05362F-s002.pdf [file SC-010-C8SC05362F-s002.pdf]

## Mechanism of Magnetization Relaxation in $\{M^{III}_2Dy^{III}_2\}$ ( $M = Cr, Mn, Fe, Al$ ) “Butterfly” Complexes: How Important Are the Transition Metal Ions Here?

Yan Peng,<sup>ab</sup> Mukesh Kumar Singh,<sup>c</sup> Valeriu Mereacre,<sup>a</sup> Christopher E. Anson,<sup>a</sup> Gopalan Rajaraman,<sup>\*c</sup> Annie K. Powell,<sup>\*ab</sup>

### Supporting Information

**Table S1.** Crystal data and structure refinement for compounds **1**, **2**, **3**, **4** and **8**

| Compound                                     | <b>1</b>                                                                                          | <b>2</b>                                                                                         | <b>3</b>                                                                                                      | <b>4</b>                                                                                         | <b>8</b>                                                                                                               |
|----------------------------------------------|---------------------------------------------------------------------------------------------------|--------------------------------------------------------------------------------------------------|---------------------------------------------------------------------------------------------------------------|--------------------------------------------------------------------------------------------------|------------------------------------------------------------------------------------------------------------------------|
| Formula                                      | Cr <sub>2</sub> Dy <sub>2</sub> C <sub>72</sub> H <sub>78</sub> N <sub>6</sub><br>O <sub>18</sub> | Cr <sub>2</sub> Y <sub>2</sub> C <sub>72</sub> H <sub>78</sub><br>N <sub>6</sub> O <sub>18</sub> | Mn <sub>2</sub> Dy <sub>2</sub> C <sub>74</sub> H <sub>8</sub><br><sub>2</sub> N <sub>6</sub> O <sub>20</sub> | Mn <sub>2</sub> Y <sub>2</sub> C <sub>74</sub> H <sub>82</sub><br>N <sub>6</sub> O <sub>20</sub> | Al <sub>2</sub> Dy <sub>0.18</sub> Y <sub>1.82</sub><br>C <sub>72</sub> H <sub>78</sub> N <sub>6</sub> O <sub>18</sub> |
| Mr [g mol <sup>-1</sup> ]                    | 1744.40                                                                                           | 1597.22                                                                                          | 1878.46                                                                                                       | 1731.27                                                                                          | 1560.43                                                                                                                |
| Colour                                       | green                                                                                             | green                                                                                            | brown                                                                                                         | brown                                                                                            | white                                                                                                                  |
| Crystal System                               | monoclinic                                                                                        | monoclinic                                                                                       | triclinic                                                                                                     | triclinic                                                                                        | monoclinic                                                                                                             |
| Space Group                                  | <i>C2/c</i>                                                                                       | <i>C2/c</i>                                                                                      | <i>P-1</i>                                                                                                    | <i>P-1</i>                                                                                       | <i>C2/c</i>                                                                                                            |
| T [K]                                        | 150 (2)                                                                                           | 200                                                                                              | 150 (2)                                                                                                       | 293                                                                                              | 150 (2)                                                                                                                |
| a [Å]                                        | 28.044 (3)                                                                                        | 28.1143(3)                                                                                       | 11.1952 (2)                                                                                                   | 11.20                                                                                            | 27.5982(3)                                                                                                             |
| b [Å]                                        | 10.4184 (9)                                                                                       | 10.5198(2)                                                                                       | 13.2472 (3)                                                                                                   | 13.27                                                                                            | 10.6800 (2)                                                                                                            |
| c [Å]                                        | 24.335 (3)                                                                                        | 24.3898(3)                                                                                       | 14.6071(3)                                                                                                    | 14.73                                                                                            | 24.4179 (2)                                                                                                            |
| [°]                                          | 90                                                                                                | 90                                                                                               | 111.771 (2)                                                                                                   | 111.68                                                                                           | 90                                                                                                                     |
| [°]                                          | 94.793 (9)                                                                                        | 94.7940(10)                                                                                      | 93.386 (2)                                                                                                    | 93.55                                                                                            | 94.202 (1)                                                                                                             |
| [°]                                          | 90                                                                                                | 90                                                                                               | 110.092 (2)                                                                                                   | 110.12                                                                                           | 90                                                                                                                     |
| V [Å <sup>3</sup> ]                          | 7085.30 (13)                                                                                      | 7188.21(18)                                                                                      | 1845.67 (7)                                                                                                   | 1854.20                                                                                          | 7177.80 (17)                                                                                                           |
| Z                                            | 4                                                                                                 | 4                                                                                                | 1                                                                                                             |                                                                                                  | 4                                                                                                                      |
| D <sub>xcalc</sub> [g cm <sup>-3</sup> ]     | 1.635                                                                                             | 1.476                                                                                            | 1.595                                                                                                         |                                                                                                  | 1.444                                                                                                                  |
| μ(Mo-Kα) [mm <sup>-1</sup> ]                 | 2.46                                                                                              | 5.13                                                                                             | 13.98                                                                                                         |                                                                                                  | 3.81                                                                                                                   |
| F(000)                                       | 3504                                                                                              | 3288                                                                                             | 892                                                                                                           |                                                                                                  | 3219                                                                                                                   |
| Reflns collected                             | 28433                                                                                             | 23208                                                                                            | 26827                                                                                                         |                                                                                                  | 20216                                                                                                                  |
| Unique data                                  | 6736                                                                                              | 6828                                                                                             | 7030                                                                                                          |                                                                                                  | 6811                                                                                                                   |
| Rint                                         | 0.0912                                                                                            | 0.017                                                                                            | 0.035                                                                                                         |                                                                                                  | 0.032                                                                                                                  |
| Data with I > 2σ(I)                          | 4031                                                                                              | 6110                                                                                             | 6602                                                                                                          |                                                                                                  | 6259                                                                                                                   |
| parameters/restraints                        | 459/1                                                                                             | 474/1                                                                                            | 198/19                                                                                                        |                                                                                                  | 460/1                                                                                                                  |
| S on F <sup>2</sup>                          | 0.875                                                                                             | 1.06                                                                                             | 1.04                                                                                                          |                                                                                                  | 1.04                                                                                                                   |
| R <sub>1</sub> [I > 2σ(I)]                   | 0.0432                                                                                            | 0.027                                                                                            | 0.026                                                                                                         |                                                                                                  | 0.029                                                                                                                  |
| wR <sub>2</sub> (all data)                   | 0.0886                                                                                            | 0.073                                                                                            | 0.065                                                                                                         |                                                                                                  | 0.074                                                                                                                  |
| Largest diff. peak/hole [e Å <sup>-3</sup> ] | +0.59/-0.93                                                                                       | +0.39/-0.31                                                                                      | +0.64/-0.69                                                                                                   |                                                                                                  | +0.35/-0.54                                                                                                            |
| CCDC                                         | 1880458                                                                                           | 1902469                                                                                          | 1880459                                                                                                       |                                                                                                  | 1880460                                                                                                                |

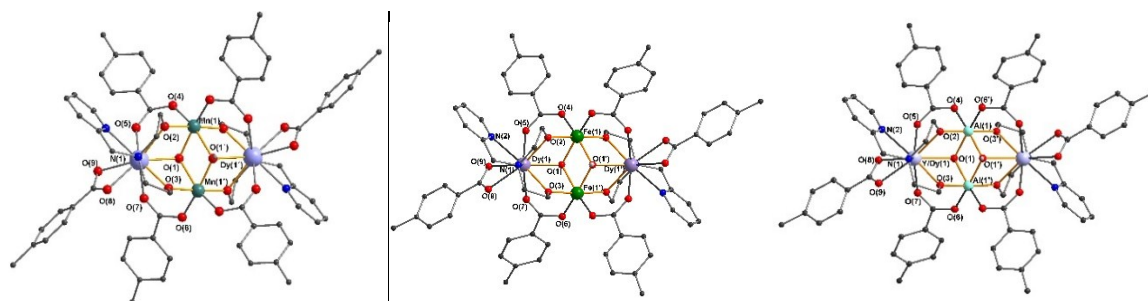

**Fig S1.** Structures of compound **3** {Mn<sub>2</sub>Dy<sub>2</sub>}, **5** {Fe<sub>2</sub>Dy<sub>2</sub>} and **8** {Al<sub>2</sub>Dy<sub>0.18</sub>Y<sub>1.82</sub>}, from left to right.

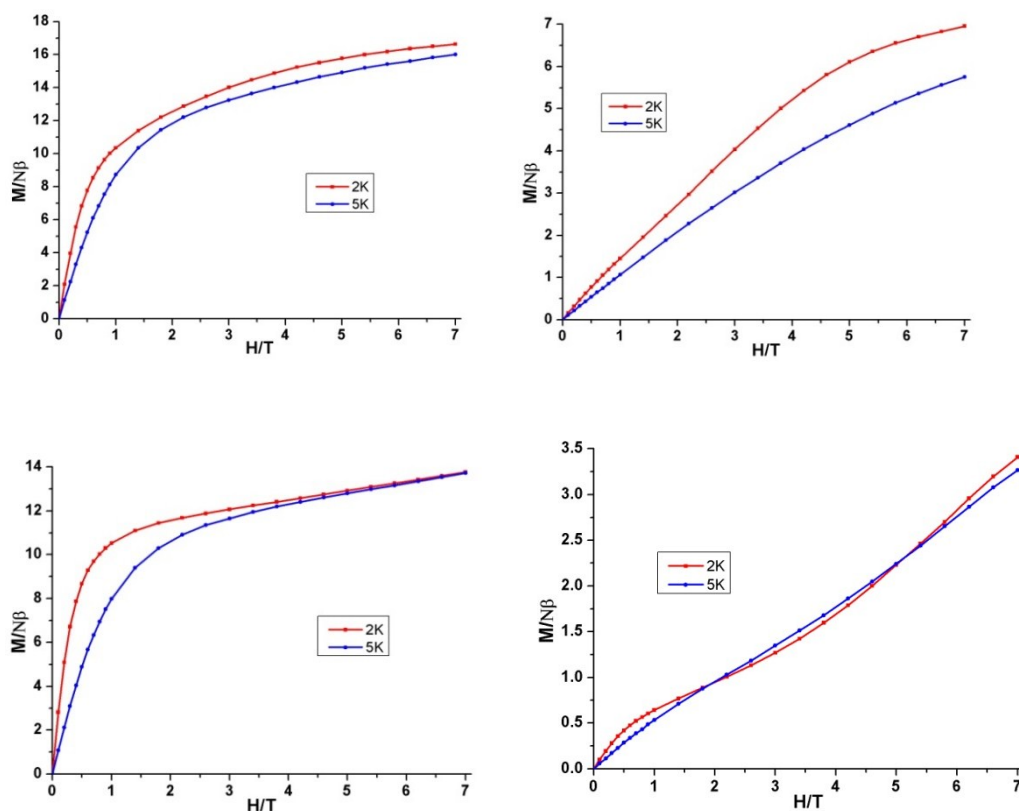

**Fig S2.** M vs H plots for **1** {Cr<sub>2</sub>Dy<sub>2</sub>} upper left, **2** {Cr<sub>2</sub>Y<sub>2</sub>} upper right, **3** {Mn<sub>2</sub>Dy<sub>2</sub>} lower left and **4** {Mn<sub>2</sub>Y<sub>2</sub>} lower right at 2 and 5 K

**Table S2.** Magnetic data of compounds **1-8** summarized from the dc measurement

| Compound                                                          | Ground state of Ln <sup>III</sup> ion | $\chi T$ expected for non-interacting ions per complex (cm <sup>3</sup> K mol <sup>-1</sup> ) | $\chi T$ measured at 300 K per complex (cm <sup>3</sup> K mol <sup>-1</sup> ) | $\chi T$ measured at 2 K per complex (cm <sup>3</sup> K mol <sup>-1</sup> ) | Magnetization at 2 K and 7 T (Nβ) |
|-------------------------------------------------------------------|---------------------------------------|-----------------------------------------------------------------------------------------------|-------------------------------------------------------------------------------|-----------------------------------------------------------------------------|-----------------------------------|
| Cr <sub>2</sub> Dy <sub>2</sub> ( <b>1</b> )                      | <sup>6</sup> H <sub>15/2</sub>        | 32.09                                                                                         | 27.70                                                                         | 23.00                                                                       | 16.64                             |
| Cr <sub>2</sub> Y <sub>2</sub> ( <b>2</b> )                       | 0                                     | 3.75                                                                                          | 3.73                                                                          | 1.44                                                                        | 6.95                              |
| Mn <sub>2</sub> Dy <sub>2</sub> ( <b>3</b> )                      | <sup>6</sup> H <sub>15/2</sub>        | 34.34                                                                                         | 33.16                                                                         | 31.75                                                                       | 13.77                             |
| Mn <sub>2</sub> Y <sub>2</sub> ( <b>4</b> )                       | 0                                     | 6                                                                                             | 5.38                                                                          | 1.10                                                                        | 3.41                              |
| Fe <sub>2</sub> Dy <sub>2</sub> ( <b>5</b> )                      | <sup>6</sup> H <sub>15/2</sub>        | 37.09                                                                                         | 36.60                                                                         | 25.77                                                                       | 11.97                             |
| Fe <sub>2</sub> Y <sub>2</sub> ( <b>6</b> )                       | 0                                     | 8.75                                                                                          | 6.61                                                                          | 0                                                                           | 0.005                             |
| Al <sub>2</sub> Dy <sub>2</sub> ( <b>7</b> )                      | <sup>6</sup> H <sub>15/2</sub>        | 28.34                                                                                         | 28.73                                                                         | 26.85                                                                       | 11.09                             |
| Al <sub>2</sub> Dy <sub>0.18</sub> Y <sub>1.82</sub> ( <b>8</b> ) | <sup>6</sup> H <sub>15/2</sub>        | 2.55                                                                                          | 2.56                                                                          | 2.25                                                                        | 1.46                              |

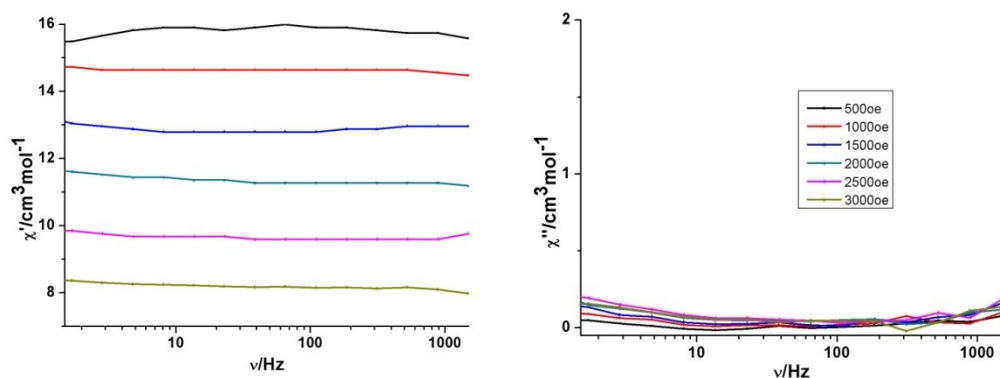

**Fig S3.** Frequency dependence of the in-phase, ( $\chi'$ , left), and out-of-phase, ( $\chi''$ , right) for **1** {Cr<sub>2</sub>Dy<sub>2</sub>} in different dc applied field at 2 K

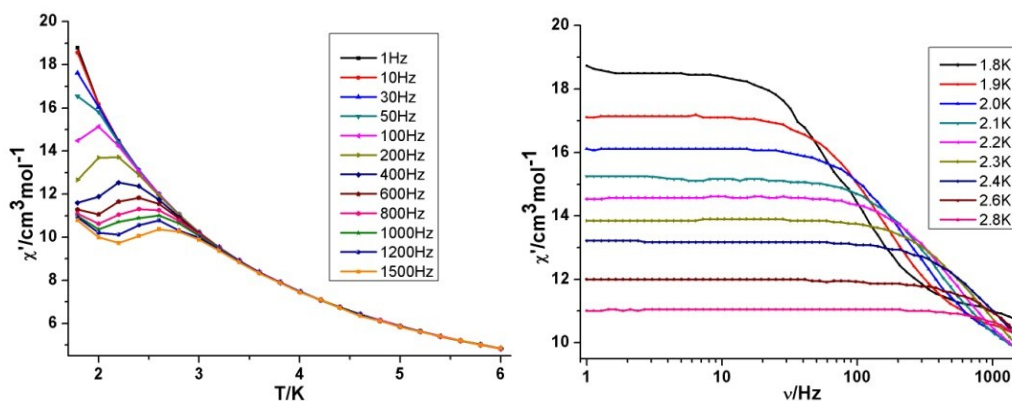

**Fig S4.** Temperature (left) and frequency (right) dependence under zero dc field of the in-phase ( $\chi'$ ) for compound **3**  $\{\text{Mn}_2\text{Dy}_2\}$

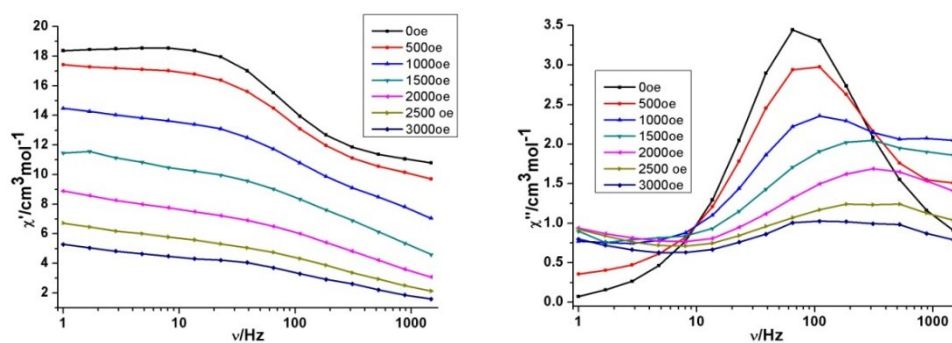

**Fig S5.** Frequency dependence of the in-phase, ( $\chi'$ , left), and out-of-phase, ( $\chi''$ , right) for **3**  $\{\text{Mn}_2\text{Dy}_2\}$  in different dc applied field at 2 K

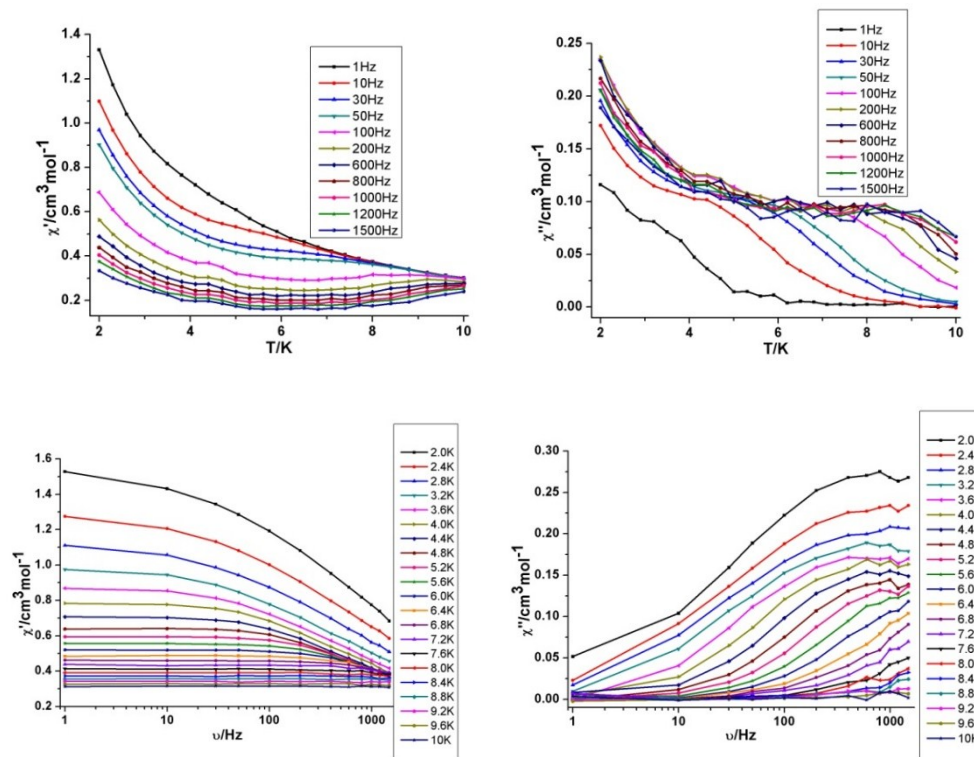

**Fig S6.** Temperature (upper) and frequency (lower) dependence under zero dc field of the in-phase ( $\chi'$ , left) and the out-of-phase ( $\chi''$ , right) for compound **8**  $\{\text{Al}_2\text{Dy}_{0.18}\text{Y}_{1.82}\}$ .

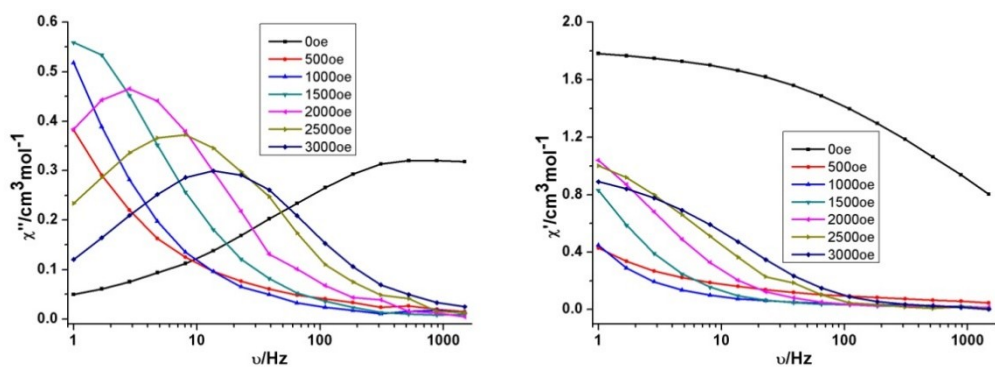

**Fig S7.** Frequency dependence of the in-phase, ( $\chi'$ , left), and out-of-phase, ( $\chi''$ , right) for **8**  $\{\text{Al}_2\text{Dy}_{0.18}\text{Y}_{1.82}\}$  in different dc applied field at 2 K.

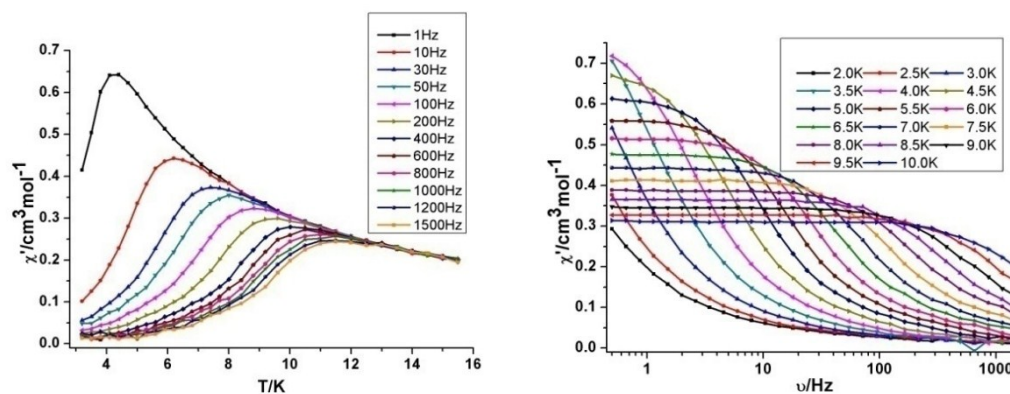

**Fig S8.** Temperature (left) and frequency (right) dependence under 1000 Oe dc field of the in-phase ( $\chi'$ ) for **8**  $\{\text{Al}_2\text{Dy}_{0.18}\text{Y}_{1.82}\}$ .

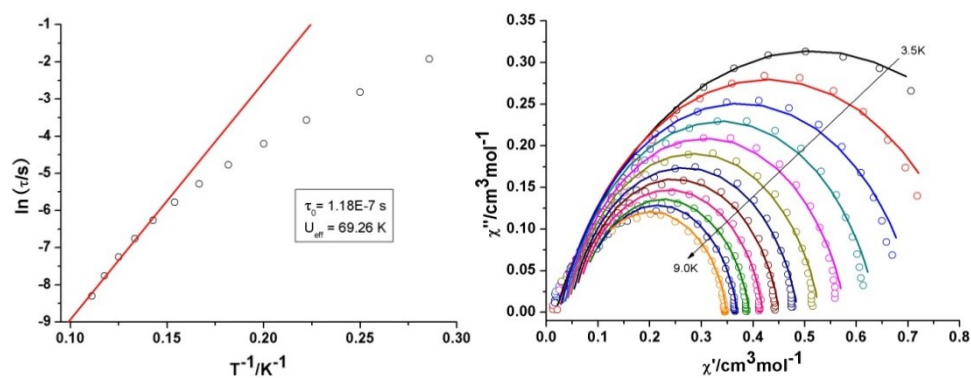

**Fig S9.**  $\tau$  vs  $T^{-1}$  plot in 1000 Oe dc field (left) and Cole-Cole plots at indicated temperature (right) for **8**  $\{\text{Al}_2\text{Dy}_{0.18}\text{Y}_{1.82}\}$  under 1000 Oe dc field.

### CC-Fit results for **3** {Mn<sub>2</sub>Dy<sub>2</sub>}

```
#####
#####      CC-FIT      #####
#####      #####
#####      (C) 2014      #####
#####      NICHOLAS F CHILTON      #####
#####      #####
#####      nfchilton@gmail.com      #####
#####
```

Number of relaxation processes: 1  
 Number of temperatures: 7  
 Number of frequencies: 60

| ChiS         | ChiT         | Tau          | Alpha        | Residual     |
|--------------|--------------|--------------|--------------|--------------|
| 0.107216E+02 | 0.186312E+02 | 0.174093E-02 | 0.934268E-01 | 0.107496E+01 |
| 0.100344E+02 | 0.172184E+02 | 0.931198E-03 | 0.903989E-01 | 0.445438E+00 |
| 0.950108E+01 | 0.161609E+02 | 0.571458E-03 | 0.827729E-01 | 0.223243E+00 |
| 0.903574E+01 | 0.152250E+02 | 0.373962E-03 | 0.826088E-01 | 0.189436E+00 |
| 0.880901E+01 | 0.146193E+02 | 0.281169E-03 | 0.668418E-01 | 0.184881E+00 |
| 0.842699E+01 | 0.138960E+02 | 0.193295E-03 | 0.676645E-01 | 0.108447E+00 |
| 0.806101E+01 | 0.132001E+02 | 0.133901E-03 | 0.713518E-01 | 0.466416E-01 |

### CC-Fit results for **8** {Al<sub>2</sub>Dy<sub>0.18</sub>Y<sub>1.82</sub>}

```
#####
#####      CC-FIT      #####
#####      #####
#####      (C) 2014      #####
#####      NICHOLAS F CHILTON      #####
#####      #####
#####      nfchilton@gmail.com      #####
#####
```

Number of relaxation processes: 1  
 Number of temperatures: 17  
 Number of frequencies: 30

| ChiS         | ChiT         | Tau          | Alpha        | Residual     |
|--------------|--------------|--------------|--------------|--------------|
| 0.137259E-01 | 0.185012E+01 | 0.359401E+01 | 0.412251E+00 | 0.415399E-03 |
| 0.162190E-01 | 0.155148E+01 | 0.148373E+01 | 0.379562E+00 | 0.374572E-03 |
| 0.161577E-01 | 0.123017E+01 | 0.447231E+00 | 0.336044E+00 | 0.685720E-03 |
| 0.187810E-01 | 0.100887E+01 | 0.146498E+00 | 0.286646E+00 | 0.348529E-02 |
| 0.244279E-01 | 0.831419E+00 | 0.600243E-01 | 0.235533E+00 | 0.430114E-02 |
| 0.267668E-01 | 0.719509E+00 | 0.281982E-01 | 0.209957E+00 | 0.512967E-02 |
| 0.326300E-01 | 0.638829E+00 | 0.147587E-01 | 0.185053E+00 | 0.589465E-02 |
| 0.366325E-01 | 0.577515E+00 | 0.844365E-02 | 0.174194E+00 | 0.507749E-02 |
| 0.409173E-01 | 0.526689E+00 | 0.505776E-02 | 0.164395E+00 | 0.429966E-02 |
| 0.451417E-01 | 0.484839E+00 | 0.308612E-02 | 0.161713E+00 | 0.314975E-02 |
| 0.496245E-01 | 0.448845E+00 | 0.190498E-02 | 0.154199E+00 | 0.226735E-02 |
| 0.541091E-01 | 0.417665E+00 | 0.116453E-02 | 0.149515E+00 | 0.134646E-02 |
| 0.587139E-01 | 0.390639E+00 | 0.704651E-03 | 0.145857E+00 | 0.955193E-03 |
| 0.610797E-01 | 0.366848E+00 | 0.424532E-03 | 0.129336E+00 | 0.344414E-03 |
| 0.538812E-01 | 0.346708E+00 | 0.246788E-03 | 0.140537E+00 | 0.223625E-03 |
| 0.646365E-01 | 0.328133E+00 | 0.155656E-03 | 0.126125E+00 | 0.112848E-03 |
| 0.730838E-01 | 0.311723E+00 | 0.101946E-03 | 0.111941E+00 | 0.166666E-03 |

**Table S3.** *Ab Initio* computed ground state  $g$ -tensors, D, E values along with their respective energy for all paramagnetic metal centers in complexes **1** {Cr<sub>2</sub>Dy<sub>2</sub>}, **3** {Mn<sub>2</sub>Dy<sub>2</sub>}, **5** {Fe<sub>2</sub>Dy<sub>2</sub>} and **7**{Al<sub>2</sub>Dy<sub>2</sub>}.

|     | Dy1/Dy2     |                 |                 |                 | Cr1/Cr2         |                 |                 | D cm <sup>-1</sup> | E cm <sup>-1</sup> |
|-----|-------------|-----------------|-----------------|-----------------|-----------------|-----------------|-----------------|--------------------|--------------------|
|     | E           | g <sub>xx</sub> | g <sub>yy</sub> | g <sub>zz</sub> | g <sub>xx</sub> | g <sub>yy</sub> | g <sub>zz</sub> |                    |                    |
| KD1 | 0.0/0.0     | 0.28/0.18       | 0.47/0.30       | 18.14/18.67     | 1.96            | 1.96            | 1.96            | -0.14              | -0.03              |
| KD2 | 27.0/33.9   | 0.22/0.10       | 0.45/0.26       | 18.10/17.90     |                 |                 |                 |                    |                    |
| KD3 | 78.3/92.0   | 1.97/1.93       | 3.42/3.22       | 13.06/12.98     |                 |                 |                 |                    |                    |
| KD4 | 140.9/161.6 | 7.49/3.97       | 5.79/5.67       | 3.81/7.48       |                 |                 |                 |                    |                    |
| KD5 | 223.0/246.5 | 2.42/0.94       | 3.66/3.39       | 8.57/9.41       |                 |                 |                 |                    |                    |
| KD6 | 255.5/291.1 | 1.42/1.34       | 5.04/3.64       | 13.10/13.66     |                 |                 |                 |                    |                    |
| KD7 | 317.9/368.3 | 0.17/0.11       | 0.59/0.35       | 18.46/18.74     |                 |                 |                 |                    |                    |
| KD8 | 418.0/449.8 | 0.04/0.03       | 0.09/0.08       | 19.57/19.56     |                 |                 |                 |                    |                    |

|     | Dy1/Dy2     |                 |                 |                 | Mn1/Mn2         |                 |                 | D cm <sup>-1</sup> | E cm <sup>-1</sup> |
|-----|-------------|-----------------|-----------------|-----------------|-----------------|-----------------|-----------------|--------------------|--------------------|
|     | E           | g <sub>xx</sub> | g <sub>yy</sub> | g <sub>zz</sub> | g <sub>xx</sub> | g <sub>yy</sub> | g <sub>zz</sub> |                    |                    |
| KD1 | 0.0/0.0     | 0.13/0.13       | 0.36/0.36       | 19.35/19.34     | 1.99            | 1.99            | 1.97            | -3.35              | 0.73               |
| KD2 | 50.2/50.2   | 1.78/1.78       | 5.93/5.92       | 12.16/12.16     |                 |                 |                 |                    |                    |
| KD3 | 79.7/79.7   | 2.89/2.88       | 4.80/4.80       | 7.91/7.90       |                 |                 |                 |                    |                    |
| KD4 | 112.2/112.2 | 1.30/1.30       | 3.29/3.28       | 11.80/11.79     |                 |                 |                 |                    |                    |
| KD5 | 178.6/178.6 | 1.67/1.66       | 3.24/3.24       | 11.95/11.94     |                 |                 |                 |                    |                    |
| KD6 | 223.3/223.3 | 1.98/1.97       | 2.49/2.49       | 15.60/15.59     |                 |                 |                 |                    |                    |
| KD7 | 283.5/283.5 | 0.23/0.23       | 0.38/0.38       | 19.08/19.05     |                 |                 |                 |                    |                    |
| KD8 | 344.5/344.5 | 0.00/0.00       | 0.08/0.08       | 19.40/19.38     |                 |                 |                 |                    |                    |

|     | Dy1/Dy2     |                 |                 |                 | Fe1/Fe2         |                 |                 | D cm <sup>-1</sup> | E cm <sup>-1</sup> |
|-----|-------------|-----------------|-----------------|-----------------|-----------------|-----------------|-----------------|--------------------|--------------------|
|     | E           | g <sub>xx</sub> | g <sub>yy</sub> | g <sub>zz</sub> | g <sub>xx</sub> | g <sub>yy</sub> | g <sub>zz</sub> |                    |                    |
| KD1 | 0.0/0.0     | 0.25/0.18       | 0.47/0.35       | 18.01/18.09     | 2.00            | 2.00            | 2.00            | -0.10              | -0.02              |
| KD2 | 39.9/44.0   | 1.26/0.88       | 1.40/0.97       | 15.18/15.79     |                 |                 |                 |                    |                    |
| KD3 | 88.6/96.0   | 0.25/0.82       | 2.94/3.08       | 14.14/14.14     |                 |                 |                 |                    |                    |
| KD4 | 126.6/142.3 | 4.29/4.39       | 5.34/5.23       | 8.92/8.60       |                 |                 |                 |                    |                    |
| KD5 | 192.1/212.0 | 1.48/0.84       | 2.63/2.65       | 10.67/10.29     |                 |                 |                 |                    |                    |
| KD6 | 218.5/247.5 | 1.25/1.17       | 3.77/3.11       | 14.34/14.39     |                 |                 |                 |                    |                    |
| KD7 | 291.2/330.3 | 0.09/0.05       | 0.21/0.13       | 18.92/19.17     |                 |                 |                 |                    |                    |
| KD8 | 391.8/407.0 | 0.02/0.02       | 0.04/0.04       | 19.67/19.64     |                 |                 |                 |                    |                    |

|     | Dy1/Dy2     |                 |                 |                 |
|-----|-------------|-----------------|-----------------|-----------------|
|     | E           | g <sub>xx</sub> | g <sub>yy</sub> | g <sub>zz</sub> |
| KD1 | 0.0/0.0     | 0.17/0.14       | 0.19/0.16       | 19.05/19.00     |
| KD2 | 47.0/43.5   | 1.02/0.70       | 1.62/0.98       | 16.56/16.98     |
| KD3 | 87.9/93.0   | 0.75/1.14       | 3.18/3.15       | 13.87/13.60     |
| KD4 | 133.1/146.4 | 4.36/4.64       | 5.53/5.42       | 8.02/8.02       |
| KD5 | 212.3/229.2 | 1.19/0.63       | 2.31/2.37       | 9.54/9.52       |
| KD6 | 251.6/275.9 | 1.04/1.01       | 2.82/2.48       | 14.11/14.00     |
| KD7 | 322.0/358.9 | 0.06/0.04       | 0.16/0.14       | 19.13/19.13     |
| KD8 | 430.8/445.4 | 0.02/0.02       | 0.03/0.04       | 19.67/19.62     |

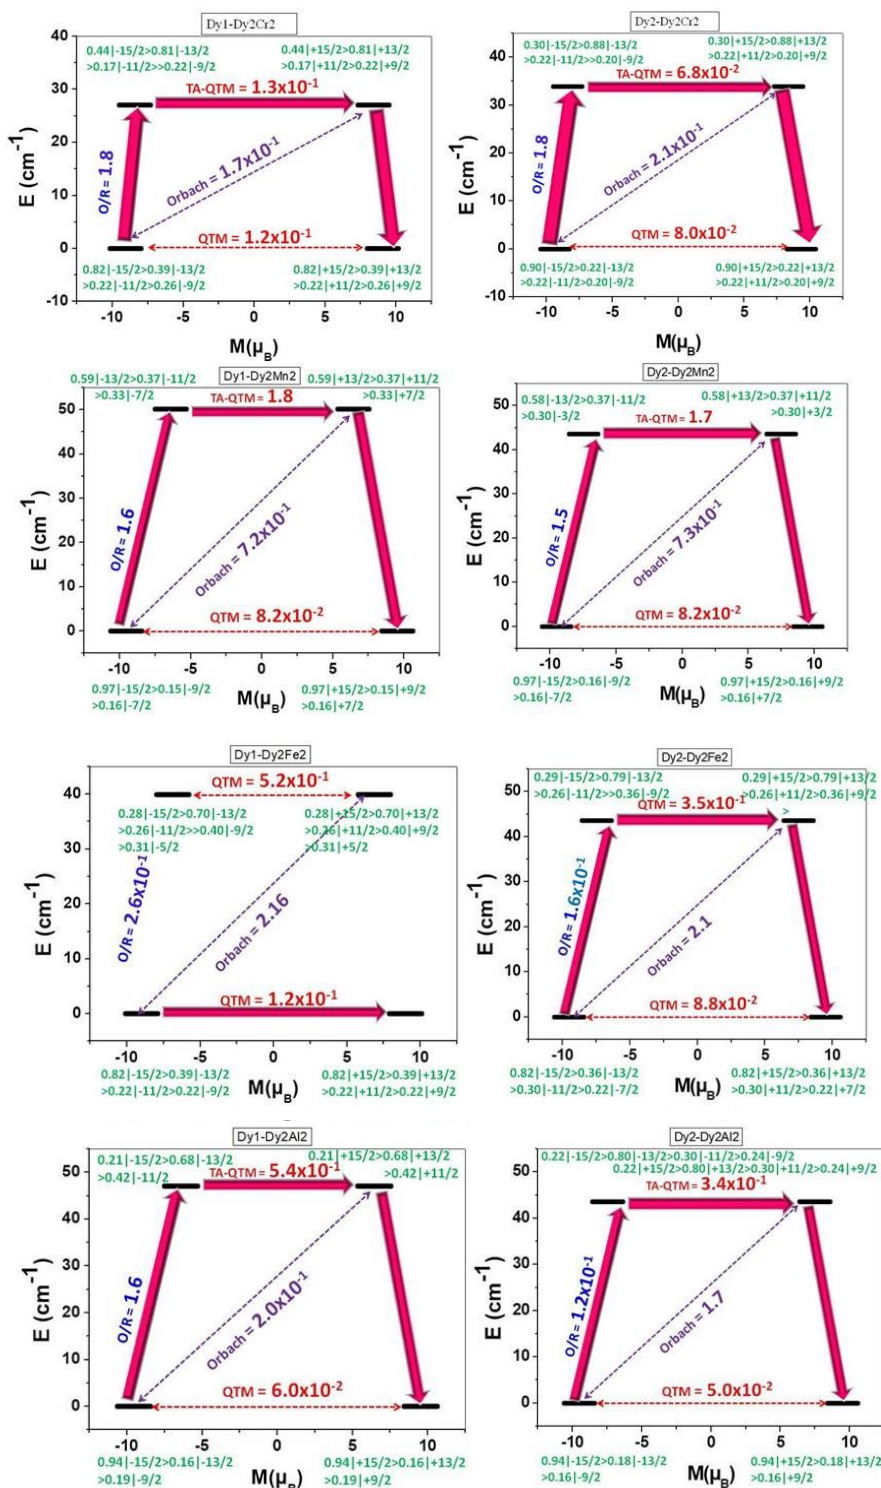

**Fig S10.** The *ab initio* computed magnetization blocking barrier for Dy1 and Dy2 ions of complexes **1** {Cr<sub>2</sub>Dy<sub>2</sub>}, **3** {Mn<sub>2</sub>Dy<sub>2</sub>}, **5** {Fe<sub>2</sub>Dy<sub>2</sub>} and **7** {Al<sub>2</sub>Dy<sub>2</sub>}. The x-axis indicates the magnetic moment of each state along main magnetic axis of Dy ions, while y-axis denotes the energy of the respective states. The thick black lines indicate the Kramer's doublets as a function of computed magnetic moment. The indigo arrows show the possible pathway via Orbach/Raman relaxation. The dotted red lines represent the presence of QTM/TA-QTM between the connecting pairs. The numbers provided at each arrow are the mean absolute value for the corresponding matrix element of transition magnetic moment. The numbers given in green color correspond to wave function analysis of the  $m_j$  levels.

Fig  
S11.

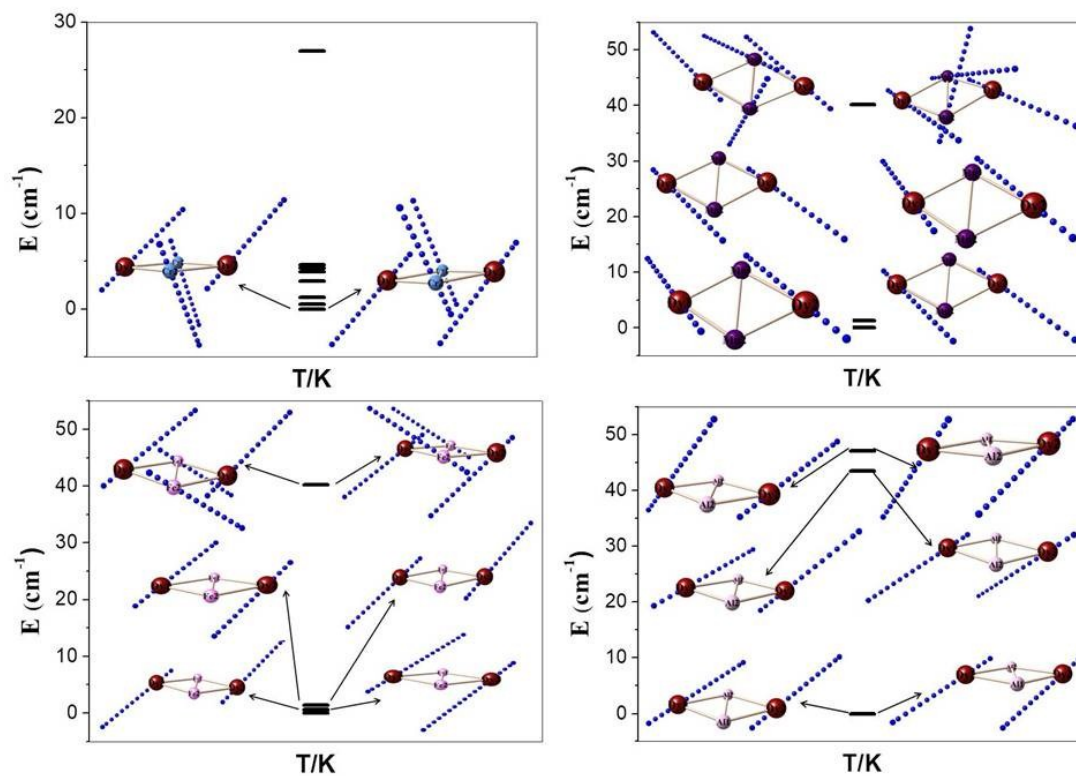

POLY\_ANISO computed low-lying exchange spectrum for complexes **1** {Cr<sub>2</sub>Dy<sub>2</sub>}, **3** {Mn<sub>2</sub>Dy<sub>2</sub>}, **5** {Fe<sub>2</sub>Dy<sub>2</sub>} and **7** {Al<sub>2</sub>Dy<sub>2</sub>}.

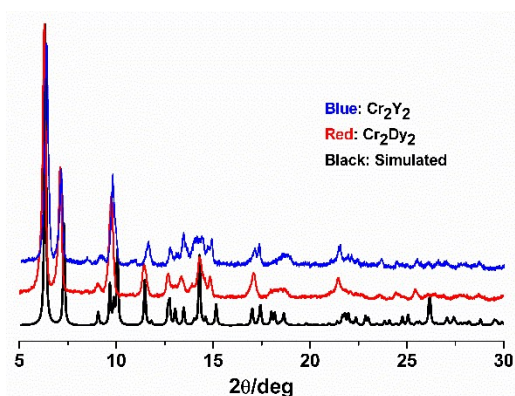

Fig S12. The powder diffraction of compounds **1** {Cr<sub>2</sub>Dy<sub>2</sub>} and **2** {Cr<sub>2</sub>Y<sub>2</sub>}

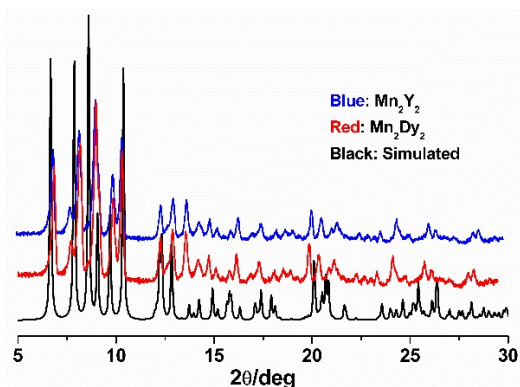

Fig S13. The powder diffraction of compounds **3** {Mn<sub>2</sub>Dy<sub>2</sub>} and **4** {Mn<sub>2</sub>Y<sub>2</sub>}
